# Supplementary material for: Efficacy and safety of antiplatelet agents in patients with COVID-19 a systematic review and meta-analysis of observational studies
Source: Research Square preprint supplement (doi:10.21203/rs.3.rs-417531/v1), 2021-06-17
Supplement: Supplementary file 1 [file dded159cf07d533a6f07d2d8.docx]

Table S1. NOS for Assessment of Quality of Included Studies: Cohort Studies

| Study | Selection | | | | Comparability | | Outcomes | |  |
| --- | --- | --- | --- | --- | --- | --- | --- | --- | --- |
| Representativeness of exposed cohort? | Selection of the nonexposed cohort? | Ascertainment of exposure? | Demonstration that outcome of interest was not represent at the start of the study | Comparability of Cohort | Assessment of outcome | Was follow-up long enough for outcomes to occur | Adequacy of follow up of cohorts | Total score |
| Chow, et al. (2021) | * | * | * | * | * * | * | - | - | 7 |
| Liu, et al. (2021) | * | * | * | * | * * | * | - | - | 7 |
| Helena, et al. (2020) | * | * | * | * | * * | * | - | - | 7 |
| Merzon, et al. (2021) | * | * | * | * | * * | * | - | - | 7 |
| Osborne, et al. (2021) | * | * | * | * | * * | * | - | - | 7 |
| Sahai, et al. (2020) | * | * | * | * | * | * | - | - | 6 |
| Yuan, et al. (2020) | * | * | * | * | * * | * | * | - | 8 |

Table S2. NOS for Assessment of Quality of Included Studies: Case-Control Studies

| Study | Selection | | | | Comparability | | Exposure | | |  |
| --- | --- | --- | --- | --- | --- | --- | --- | --- | --- | --- |
| Is the case definition adequate | Representativeness of cases | Selection of controls | Definition of controls | Study controls for age/sex | Study controls for at least 3 additional factors | Ascertainment of exposure | Same method of ascertainment of exposure | Nonresponse rate | Total score |
| Alamdari,et al.(2020) | * | * | * | * | - | - | * | * | - | 6 |
| Russo, et al. (2020) | * | * | * | * | - | - | * | * | * | 7 |
| Meizlish, et al. (2021) | * | * | * | * | - | - | * | * | - | 6 |
| Giacomelli, et al. (2020) | * | * | * | * | - | - | * | * | - | 6 |
